# Supplementary material
Source: PubMed Central journal article supplement (PMC8610022)
Supplement: NIHMS1752540-supplement-1.pdf [file NIHMS1752540-supplement-1.pdf]

Figure S1

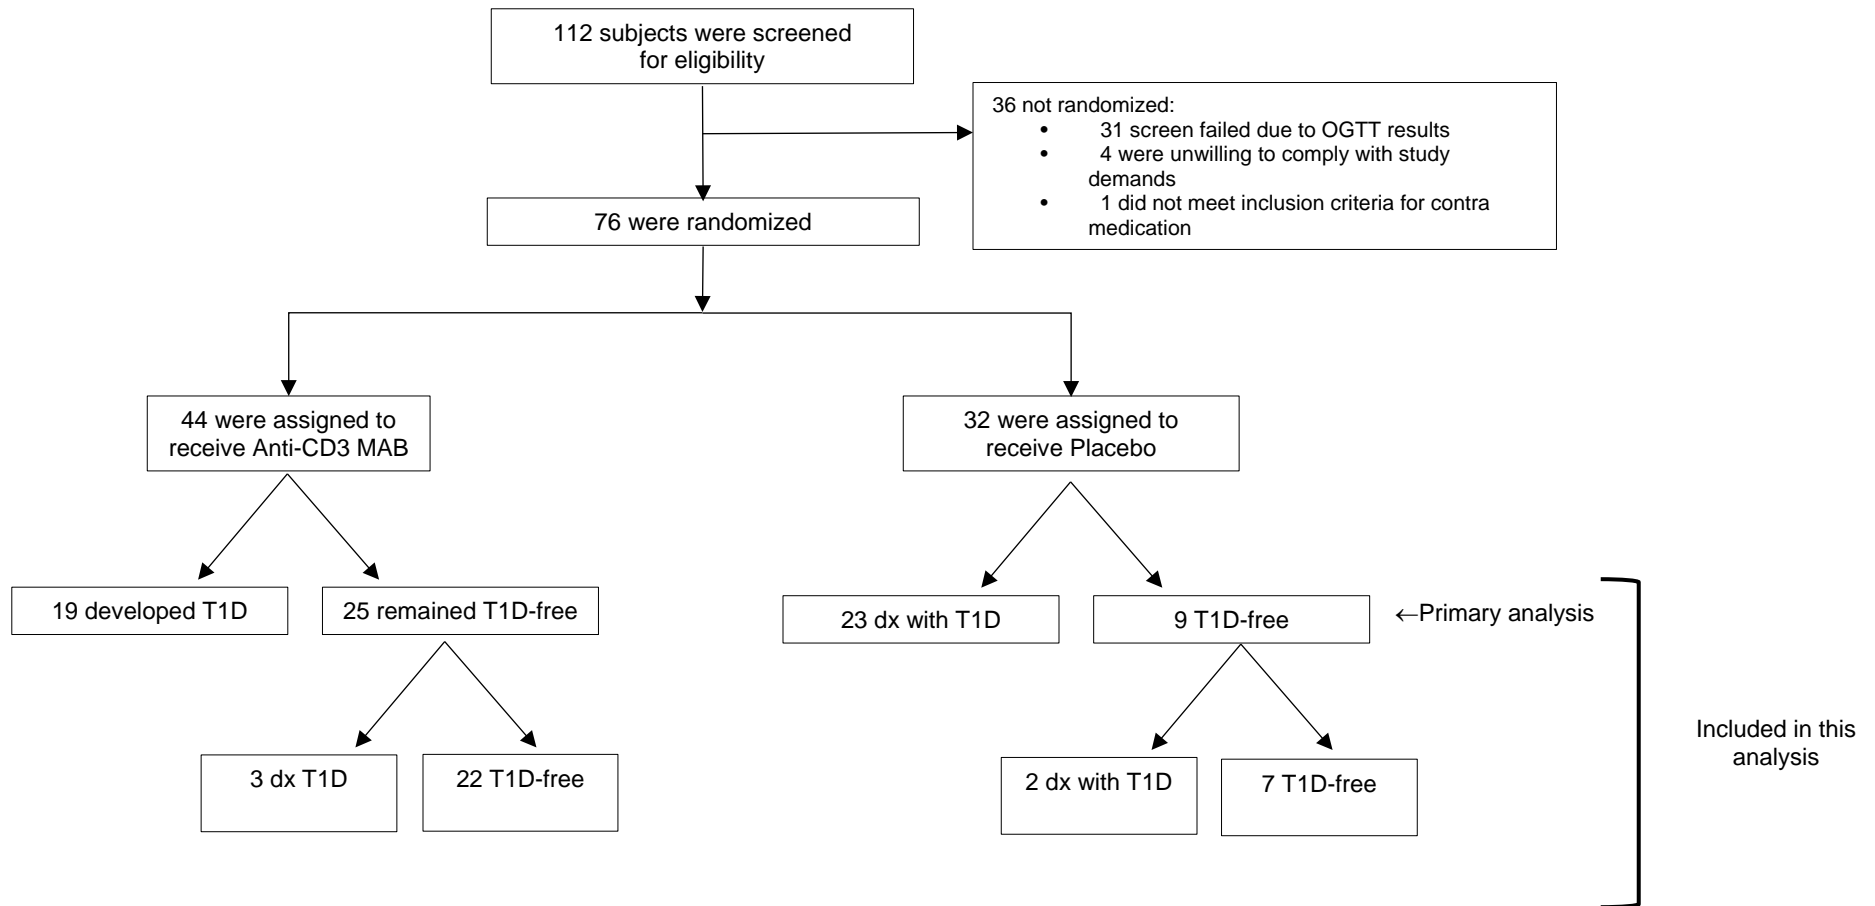

Supplemental Figure 1: Consort diagram

Figure S2

A Teplizumab treated participants

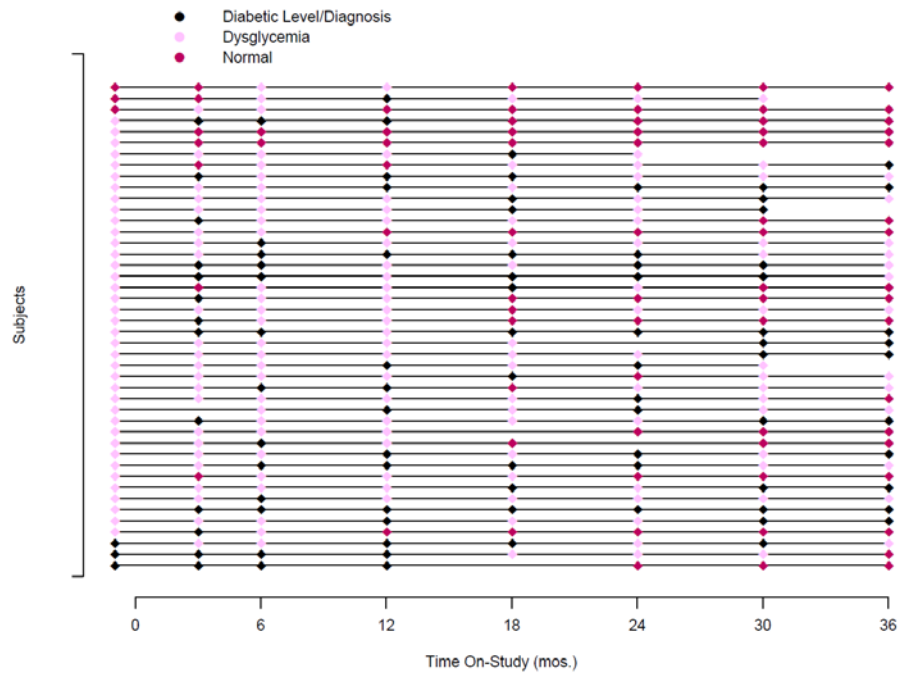

B Placebo treated participants

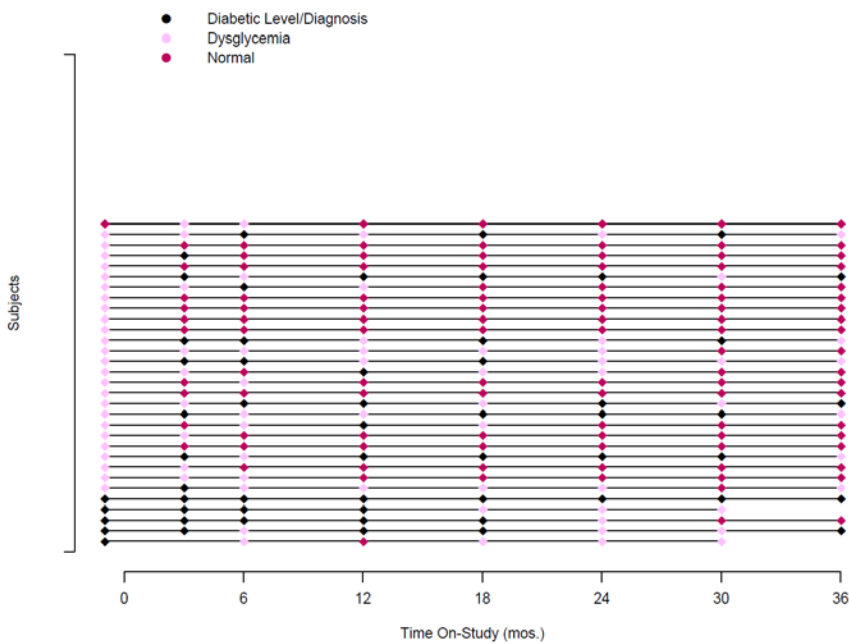

**Supplemental Figure 2: Results of OGTT tests over the first 36 months in (A) teplizumab and (B) placebo treated participants:** Each line represents a participant. The symbols indicate the time of OGTT testing. The results are indicated as: ●=diabetic level/diagnosis, ●=dysglycemia, ●=normal

A

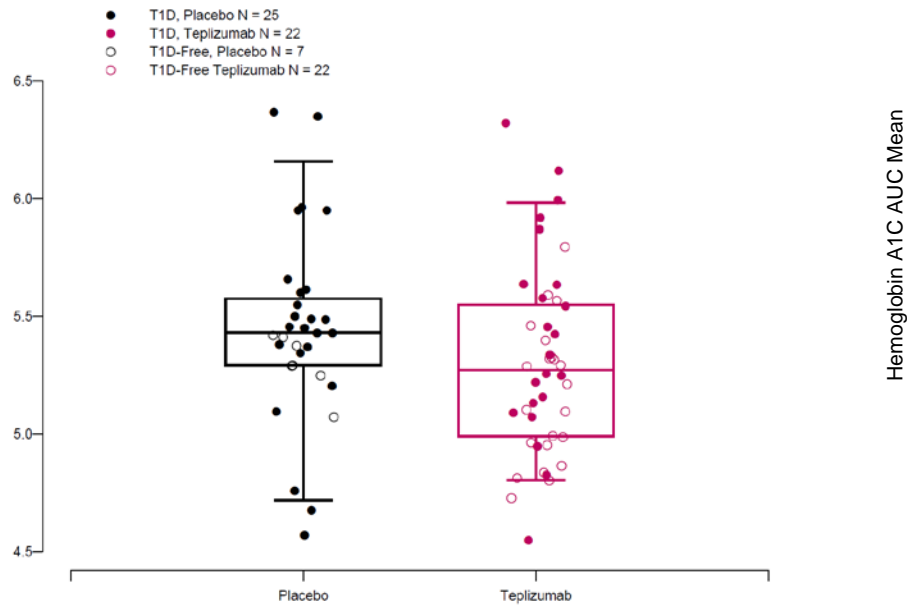

B

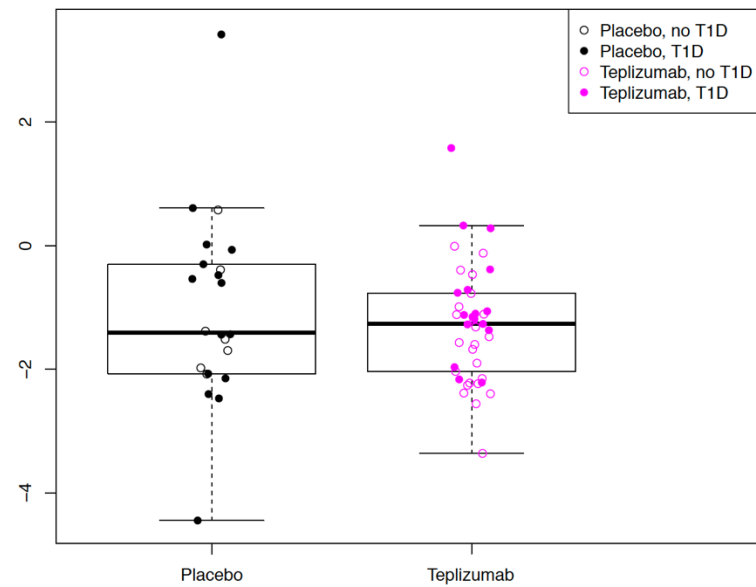

**Supplemental Figure 3: Average on-study Hemoglobin A1c levels and Proinsulin:C-peptide ratios showed no significant differences between the treatment groups: A.** Boxplot displaying median and interquartile ranges for average on-study Hemoglobin A1c AUC for participants from placebo and teplizumab treated groups. ANCOVA model incorporating baseline value, age, and treatment group showed no significant impact of treatment group ( $p=0.14$ ). **B.** On-study PI:C ratio was calculated using on treatment values and showed no significant differences between groups. ( $n=22$  in placebo and 41 in teplizumab,  $p=0.31$ , Wilcoxon rank sum test)

Figure S4

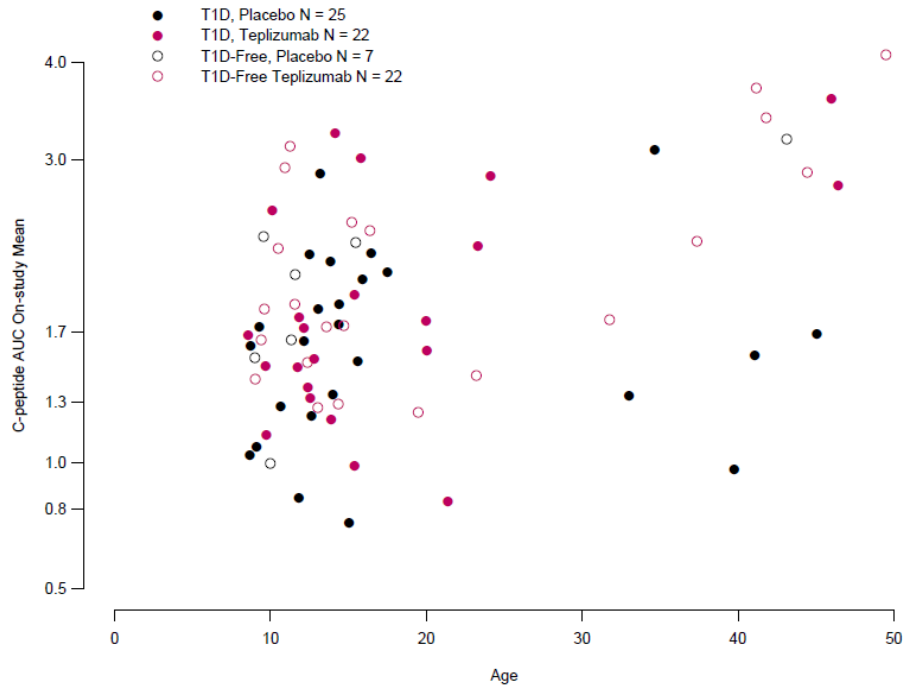

**Supplemental Figure 4. Relationship of Average on Study C-peptide AUC with Age and Average on Study Glucose AUC.** Scatterplot of age vs. on-study C-peptide AUC ( $r=0.44$ ,  $p=0.0001$ )

Figure S5

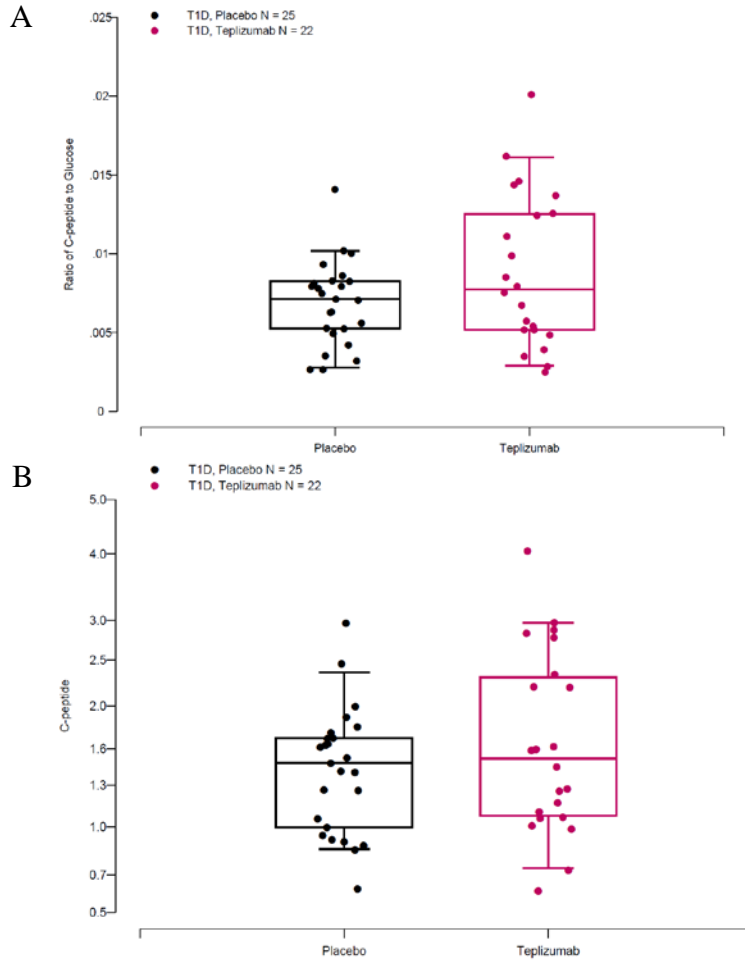

**Supplemental Figure 5. C-peptide values are similar between treatment groups at the time of diagnosis. A. C-peptide AUC/Glucose AUC at the time of clinical diagnosis of T1D. B. C-peptide AUC at the time of clinical diagnosis of T1D. Values were obtained from the first of two consecutive diagnostic OGTTs consistent with a classification of T1D.**

Figure S6

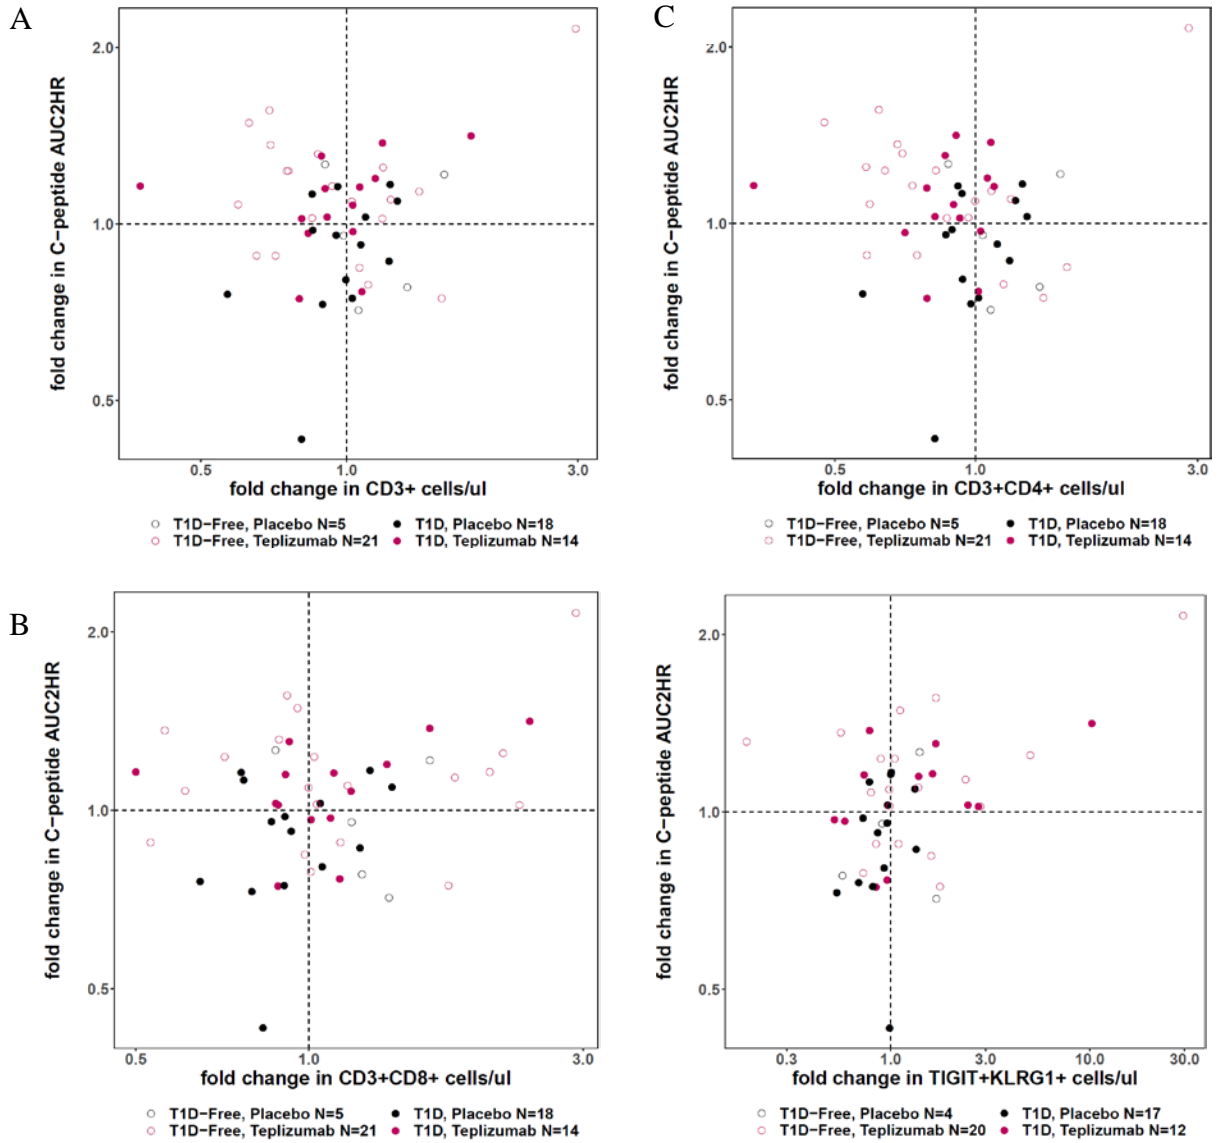

**Supplemental Figure 6. Changes in the number of circulating T cells at month 3 and C-peptide AUC at month 6.** A: CD3+ T cells, Pearson  $r=0.19$ ,  $p=0.28$ ; B: CD3+CD4+ T cells,  $r=0.01$ ,  $p=0.97$ ; C: CD3+CD8+ T cells,  $r=0.24$ ,  $p=0.17$ ; D: CD3+CD8+CD45RO+TIGIT+KLRG1+ T cells,  $r=0.4$ ,  $p=0.02$

Supplemental Table 1: ANCOVA Model of On-study Glucose AUC Mean (transformed scale: natural log (ln))

| Covariate            | Coefficient | Standard Error | t-test | p-value  |
|----------------------|-------------|----------------|--------|----------|
| (Intercept)          | 3.11        | 0.592          | 5.25   | < 0.0001 |
| Glucose (baseline)   | 0.408       | 0.117          | 3.50   | 0.0008   |
| Age                  | -0.000309   | 0.00143        | -0.215 | 0.83     |
| Teplizumab treatment | -0.0776     | 0.0335         | -2.32  | 0.02     |

Predicted means for Teplizumab and Placebo groups are 164 and 177 mg/dL, respectively (baseline glucose and age set to the cohort mean) – Teplizumab mean is 92.5% of the placebo mean.

Supplemental Table 2: ANCOVA Model of On-study A1c AUC Mean (Ln-Ln transform)

| Covariate            | Coefficient | Standard Error | t-test | p-value  |
|----------------------|-------------|----------------|--------|----------|
| (Intercept)          | 0.0981      | 0.0483         | 2.03   | 0.05     |
| A1c (baseline)       | 0.863       | 0.0968         | 8.92   | < 0.0001 |
| Age                  | -0.000226   | 0.000307       | -0.736 | 0.46     |
| Teplizumab treatment | -0.011      | 0.00715        | -1.53  | 0.13     |

Supplemental Table 3: ANCOVA Model of On-study C-peptide AUC Mean (ln(x+1) transform)

| Covariate            | Coefficient | Standard Error | t-test | p-value  |
|----------------------|-------------|----------------|--------|----------|
| (Intercept)          | 0.116       | 0.0601         | 1.92   | 0.06     |
| C-peptide (baseline) | 0.78        | 0.0575         | 13.6   | < 0.0001 |
| Age                  | 0.00346     | 0.00124        | 2.79   | 0.007    |
| Teplizumab treatment | 0.0768*     | 0.0271         | 2.83   | 0.006    |

\*Predicted means for Teplizumab and Placebo groups are 1.94 and 1.72 nano-moles/L, respectively (baseline C-peptide and age set to the cohort mean)

Supplemental Table 4. Comparison of C-peptide AUC means among teplizumab and placebo

| Treatment Group | TN-10 or Control Subject | Baseline  |           | 3 months  |           | 6 months  |           |
|-----------------|--------------------------|-----------|-----------|-----------|-----------|-----------|-----------|
|                 |                          | Mean      | Std. Dev. | Mean      | Std. Dev. | Mean      | Std. Dev. |
| Placebo         | TN-10*                   | 1.91 (32) | 0.704     | 1.78 (30) | 0.712     | 1.81 (25) | 0.855     |
|                 | Control                  | 2.41 (32) | 0.822     | --        | --        | --        | --        |
| Teplizumab      | TN-10*                   | 1.99 (44) | 0.833     | 2.07 (43) | 0.742     | 2.15 (44) | 0.780     |
|                 | Control                  | 2.31 (44) | 0.672     | --        | --        | --        | --        |

groups and matched islet autoantibody negative relatives (non-transformed values)

\*Data shown as means (number of participants at indicated timepoint). Control Subject data is based on cross-sectional OGTTs obtained in islet autoantibody relatives matched by sex and age. For subjects < 19 years, age was matched within 6 months. Subjects  $\geq$  19 were matched within +/- 2 years with the exception of 5 subjects, which required +/- 6 years. \*The C-peptide values in the TN-10 participants were lower the matched autoantibody- controls ( $p=0.001$ , Wilcoxon).

Supplemental Table 5: Effect of HLA genotype and ZnT8 positivity on average C-peptide AUC

| Factor                 | Main Effect Coefficient (p-value*) | Interaction Effect Coefficient (p-value) |
|------------------------|------------------------------------|------------------------------------------|
| HLA-DR3                | 0.00783 (p = 0.79)                 | -0.0431 (p = 0.44)                       |
| HLA-DR4                | -0.0311 (0.27)                     | -0.0122 (p = 0.84)                       |
| ZnT8 positive/negative | -0.00814 (p = 0.80)                | 0.0129 (p = 0.84)                        |

\* interaction term was not included

Supplemental Table 6. ANCOVA analysis of C-peptide AUC slope Over 1st 6 months on Study

| Covariate            | Coefficient | Standard Error | t-test | p-value |
|----------------------|-------------|----------------|--------|---------|
| Intercept            | -0.0234     | 0.00715        | -3.27  | 0.00166 |
| Pre-slope            | -0.078      | 0.0438         | -1.78  | 0.0795  |
| Age                  | 0.000469    | 0.000284       | 1.65   | 0.103   |
| Teplizumab treatment | 0.0219      | 0.00662        | 3.31   | 0.00149 |

Supplemental Table 7: T cell phenotype flow cytometry panel

| Markers | Format | Clone    | Vendor           |
|---------|--------|----------|------------------|
| CD56    | BUV395 | NCAM16.2 | Becton Dickinson |
| CD45RA  | BUV737 | HI100    | Becton Dickinson |
| Ki67    | BV421  | Ki-67    | BioLegend        |
| CCR7    | BV510  | G043H7   | BioLegend        |
| CD3     | BV605  | OKT3     | BioLegend        |
| PD1     | BV650  | EH12.2H7 | BioLegend        |
| CD127   | BV711  | A019D5   | BioLegend        |



|        |            |         |                  |
|--------|------------|---------|------------------|
| CD45R0 | BV786      | UCHL1   | Becton Dickinson |
| CD4    | BB515      | RPA-T4  | Becton Dickinson |
| Eomes  | PE         | WD1928  | eBiosciences     |
| FoxP3  | PE-CF594   | 259D/C7 | Becton Dickinson |
| KLRG1  | PE-Vio770  | REA261  | Miltenyi         |
| TIGIT  | APC        | MBSA43  | eBioscience      |
| CD8    | Ax700      | SK1     | BioLegend        |
| CD57   | APC-Vio770 | REA769  | Miltenyi         |
| L/D    | BUV496     | NA      | Becton Dickinson |

Supplemental Table 8: Intracellular cytokine staining flow cytometry panel

| Markers      | Format   | Clone     | Vendor           |
|--------------|----------|-----------|------------------|
| IL-17        | BV421    | BL168     | BioLegend        |
| CD45RA       | BV605    | HI100     | BioLegend        |
| GrzmB        | BV510    | GB11      | Becton Dickinson |
| PD-1         | BV650    | EH12.2H7  | BioLegend        |
| CD3          | BUV737   | UCHT1     | Becton Dickinson |
| TNF $\alpha$ | APC      | MAb11     | BioLegend        |
| CD127        | BV785    | A019D5    | BioLegend        |
| CD4          | Ax700    | RPA-T4    | BioLegend        |
| IFN $\gamma$ | BV711    | B27       | Becton Dickinson |
| FoxP3        | PE-CF594 | 259D/C7   | Becton Dickinson |
| KLRG1        | FITC     | SA231A2   | BioLegend        |
| TIGIT        | PE-Cy7   | A15153G   | BioLegend        |
| CD8          | BUV395   | RPA-T8    | Becton Dickinson |
| IL-2         | BB700    | MQ1-17H12 | Becton Dickinson |
| L/D          | BUV496   | NA        | Becton Dickinson |
